# Supplementary material for: A novel strategy for the asymmetric synthesis of chiral cyclopropane carboxaldehydes
Source: Royal Society of Chemistry journal article supplement (doi:10.1039/b501847a), 2005-01-01
Supplement: b501847a.pdf [file b501847a.pdf]

## A Novel Strategy for the Asymmetric Synthesis of Chiral Cyclopropane Carboxaldehydes

Matt Cheeseman, Fred J. P. Feuillet and Steven D. Bull\*  
Department of Chemistry, University of Bath, Bath, UK, BA2 7AY.  
Fax:(+44) 1225 386231; E-mail:s.d.bull@bath.ac.uk.

### Representative procedure for the asymmetric aldol reaction

(4*S*,3'*R*,2'*S*,4'*E*)-4-Benzyl-3-[3'-hydroxy-2'-methyl-5'-(2''-nitro-phenyl)-pent-4'-enoyl]-5,5-dimethyl-oxazolidin-2-one **3d**:

To a stirred solution of (*S*)-4-benzyl-5,5-dimethyl-3-propionyl-oxazolidin-2-one **1** (500 mg, 1.91 mmol) in CH<sub>2</sub>Cl<sub>2</sub> (20 ml) at 0°C was added 9BBN-OTf (4.21 ml, 2.10 mmol, 0.5M solution in hexane) dropwise. The reaction mixture was stirred for 30 minutes at 0°C before *N,N'*-diisopropylethylamine (0.40 ml, 2.30 mmol) was added dropwise. Stirring was continued for a further 30 minutes at 0°C before cooling the reaction to -78°C and 3-(2'-Nitro-phenyl)-propenal (373 mg, 2.10 mmol, 0.5M solution in CH<sub>2</sub>Cl<sub>2</sub>) was added dropwise. Stirring was maintained overnight as the reaction was allowed to warm to room temperature. The reaction was then quenched with pH7 phosphate buffer solution (10 ml) and stirred for 10 minutes, before a 2:1 mixture of 30% H<sub>2</sub>O<sub>2</sub> and methanol (10 ml) was added and the reaction stirred for a further two hours. CH<sub>2</sub>Cl<sub>2</sub> (10 ml) and sat. NaHCO<sub>3</sub> solution (10 ml) were added and the aqueous layer was separated and extracted with CH<sub>2</sub>Cl<sub>2</sub> (3 × 10ml). The combined organic layers were washed with brine (10 ml), dried (MgSO<sub>4</sub>), filtered and concentrated *in vacuo*. The crude diastereoisomeric excess was determined as >95% by inspection of the 300 MHz <sup>1</sup>H NMR spectrum of the crude reaction product. Purification by column chromatography eluting with CH<sub>2</sub>Cl<sub>2</sub> gave the title compound **3d** (730 mg, 87%) as a yellow oil. **3d**: [ $\alpha$ ]<sub>D</sub><sup>24</sup> = -7.6 (*c* 0.8, CH<sub>2</sub>Cl<sub>2</sub>); <sup>1</sup>H NMR (300 MHz, CDCl<sub>3</sub>) :  $\delta$ H = 7.86 (1H, app. d, <sup>3</sup>*J* (H,H) = 7.9 Hz, *CHCNO*<sub>2</sub>, Ar), 7.52 – 7.11 (8H, m, 8 × *CH*, Ar), 7.05 (1H, dd, <sup>3</sup>*J* (H,H) = 15.7 and 1.5 Hz, *o*-NO<sub>2</sub>PhCH=CH), 6.10 (1H, dd, <sup>3</sup>*J* (H,H) = 15.7 and 5.7 Hz, *o*-NO<sub>2</sub>PhCH=CH), 4.60 (1H, m, *CHOH*), 4.53 (1H, dd, <sup>3</sup>*J* (H,H) = 9.0 and 4.8 Hz, *NCH*), 3.99 (1H, dq, <sup>3</sup>*J* (H,H) = 3.8 and 7.1, CH<sub>3</sub>CH), 3.01 (1H, dd, <sup>3</sup>*J* (H,H) = 14.2 and 4.5, PhCH<sub>A</sub>CH<sub>B</sub>), 2.90-2.80 (2H, m,

*OH* and  $\text{PhCH}_\text{A}\text{CH}_\text{B}$ ), 1.33 (3H, s,  $\text{CH}_3(\text{CH}_3)\text{C}$ ), 1.30 (3H, s,  $(\text{CH}_3(\text{CH}_3)\text{C})$ , 1.14 (3H, d,  $^3J(\text{H},\text{H}) = 7.1$ ,  $\text{CHCH}_3$ );  $^{13}\text{C}$  NMR (75 MHz,  $\text{CDCl}_3$ ) :  $\delta\text{C} = 176.0$  ( $\text{CHCO}$ ), 158.0 ( $\text{OCO}$ ), 148.2 ( $\text{NO}_2\text{C}$ , Ar), 136.9 (Ar), 134.3 (Ar), 133.5 (Ar), 133.0 (Ar), 129.5 (Ar), 129.3 (Ar), 129.1 (Ar), 128.5 (Ar), 127.4 (Ar), 127.3 (*o*- $\text{NO}_2\text{PhCH}=\text{CH}$ ), 125.9 (*o*- $\text{NO}_2\text{PhCH}=\text{CH}$ ), 82.9 ( $(\text{CH}_3)_2\text{C}$ ), 72.9 ( $\text{CHOH}$ ), 63.7 ( $\text{NCH}$ ), 43.1 ( $\text{CH}_3\text{CH}$ ), 35.7 ( $\text{PhCH}_2$ ), 28.8 ( $\text{CH}_3(\text{CH}_3)\text{C}$ ), 22.6 ( $\text{CH}_3(\text{CH}_3)\text{C}$ ), 12.0 ( $\text{CH}_3\text{CH}$ ); IR (film /  $\text{cm}^{-1}$ )  $\nu = 3447$  ( $\text{OH}$ ), 1773 ( $\text{OC}=\text{O}$ ), 1700 ( $\text{NC}=\text{O}$ ), 1570 ( $\text{C}=\text{C}$ ), 1552 ( $\text{NO}_2$ ), 1351 ( $\text{NO}_2$ ); HRMS :  $m/z$  (ES) 459.2123,  $\text{C}_{24}\text{H}_{26}\text{N}_2\text{O}_6$   $[\text{M}+\text{NH}_4]^+$  requires 456.2129.

**Representative procedure for the stereoselective cyclopropanation reaction (4*S*,3'*R*,2'*S*,2''*S*,1''*S*)**–4-Benzyl-3-{3'-hydroxy-2'-methyl-3'-[2''-(2'''-nitro-phenyl)-cyclopropyl] -propionyl}-5,5-dimethyl-oxazolidin-2-one **4d** :

To a stirred solution of (4*S*,3'*R*,2'*S*,4'*E*)-4-benzyl-3-[3'-hydroxy-2'-methyl-5'-(2''-nitro-phenyl)-pent-4'-enoyl]-5,5-dimethyl-oxazolidin-2-one **3d** (700 mg, 1.60 mmol) in  $\text{CH}_2\text{Cl}_2$  (10 ml) at  $-10^\circ\text{C}$  was added diethyl zinc (7.98 ml, 7.98 mmol, 1.0 M solution in hexane) in one portion, before the addition of diiodomethane (0.64 ml, 7.98 mmol) in one portion. The reaction was stirred for 2 hours and allowed to warm to  $0^\circ\text{C}$ . The reaction was then quenched with sat. sodium sulfite solution (5 ml).  $\text{CH}_2\text{Cl}_2$  (5 ml) and 2M  $\text{HCl}_{(\text{aq})}$  solution (5 ml) were added and the aqueous layer was separated and extracted with  $\text{CH}_2\text{Cl}_2$  (3 × 10 ml). The combined organic layers were washed with brine (10 ml), dried ( $\text{MgSO}_4$ ), filtered and concentrated *in vacuo*. The diastereomeric excess was determined as >95% by inspection of the 300 MHz NMR spectrum of the crude reaction product. Purification by column chromatography eluting with  $\text{CH}_2\text{Cl}_2$  gave the title compound **4d** (650mg, 90%) as a white solid. **4d**: m.p.  $101\text{--}104^\circ\text{C}$ ;  $[\alpha]_\text{D}^{24} = +57.3$  ( $c$  0.9,  $\text{CH}_2\text{Cl}_2$ );  $^1\text{H}$  NMR (300 MHz,  $\text{CDCl}_3$ ) :  $\delta\text{H} = 7.75$  (1H, app. d,  $^3J(\text{H},\text{H}) = 7.9$  Hz,  $\text{CHCNO}_2$ , Ar), 7.47 – 7.06 (8H, m, 8 ×  $\text{CH}$ , Ar), 4.47 (1H, dd,  $^3J(\text{H},\text{H}) = 9.4$  and 4.5,  $\text{NCH}$ ), 3.97 (1H, dq,  $^3J(\text{H},\text{H}) = 3.4$  and 7.2,  $\text{CH}_3\text{CH}$ ), 3.68 (1H, m,  $\text{CHOH}$ ), 3.01 (1H, dd,  $^3J(\text{H},\text{H}) = 14.3$  and 4.5,  $\text{PhCH}_\text{A}\text{CH}_\text{B}$ ), 2.83 (1H, dd,  $^3J(\text{H},\text{H}) = 14.3$  and 9.0,  $\text{PhCH}_\text{A}\text{CH}_\text{B}$ ), 2.71 (1H, app. s,  $\text{OH}$ ), 2.36 (1H, app. dt,  $^3J(\text{H},\text{H}) = 8.7$  and 5.3, *o*- $\text{NO}_2\text{PhCH}$ ), 1.32 (3H, s,  $\text{CH}_3(\text{CH}_3)\text{C}$ ), 1.26 (3H, s,  $(\text{CH}_3(\text{CH}_3)\text{C})$ , 1.20 (3H, d,  $^3J(\text{H},\text{H}) = 7.2$ ,  $\text{CHCH}_3$ ), 1.16 (2H, obscured m, cyclopropyl- $\text{CH}$  and cyclopropyl- $\text{CH}_\text{A}\text{CH}_\text{B}$ ), 0.90

(1H, app. dt,  $^3J$  (H,H) = 8.7 and 5.3, cyclopropyl-CH<sub>A</sub>CH<sub>B</sub>);  $^{13}\text{C}$  NMR (75 MHz, CDCl<sub>3</sub>) :  $\delta\text{C}$  = 177.2 (CHCO), 152.8 (OCO), 151.1 (NO<sub>2</sub>C, Ar), 137.2 (Ar), 137.0 (Ar), 133.2 (Ar), 129.5 (Ar), 129.1 (Ar), 128.2 (Ar), 127.3 (Ar), 127.0 (Ar), 124.6 (Ar), 82.7 ((CH<sub>3</sub>)<sub>2</sub>C), 73.7 (CHOH), 63.7 (NCH), 43.4 (CH<sub>3</sub>CH), 35.8 (PhCH<sub>2</sub>), 28.8 (CH<sub>3</sub>(CH<sub>3</sub>)C), 25.5 (CH<sub>3</sub>(CH<sub>3</sub>)C), 22.6 (Cyclopropyl-CHPhNO<sub>2</sub>), 17.3 (cyclopropyl-CH), 12.7 (CH<sub>3</sub>CH), 12.3 (cyclopropyl-CH<sub>2</sub>); IR (KBr / cm<sup>-1</sup>)  $\nu$  = 3431 (OH), 1769 (OC=O), 1694 (NC=O), 1528 (NO<sub>2</sub>), 1367 (NO<sub>2</sub>); HRMS :  $m/z$  (ES) 470.2287, C<sub>25</sub>H<sub>28</sub>N<sub>2</sub>O<sub>6</sub> [M+NH<sub>4</sub>]<sup>+</sup> requires 470.2286.

### Representative procedure for the base catalysed *retro*-aldol reaction

#### (1*S*, 2*S*)-2-(2'-Nitro-phenyl)-cyclopropane-carboxaldehyde **5d**

To a stirred solution of (4*S*,3'*R*,2'*S*,2''*S*,1''*S*)-4-benzyl-3-{3'-hydroxy-2'-methyl-3'-[2''-(2'''-nitro-phenyl)-cyclopropyl]-propionyl}-5,5-dimethyl-oxazolidin-2-one **4d** (500 mg, 1.10 mmol) in toluene (10 ml) at 5°C was added LHMDs (1.22 ml, 1.22 mmol, 1M solution in toluene) dropwise and stirred for 4 hours. The reaction was quenched with sat. NaHCO<sub>3</sub> solution (5 ml) and the aqueous layer was separated and extracted with CH<sub>2</sub>Cl<sub>2</sub> (3 × 10ml). The combined organic layers were washed with brine (10 ml), dried (MgSO<sub>4</sub>), filtered and concentrated *in vacuo*. The diastereomeric excess was determined as >95% d.e. by inspection of the 300 MHz NMR spectrum of the crude reaction product. Purification by passing the crude product through a plug of silica eluting with CH<sub>2</sub>Cl<sub>2</sub>:ether (95:5) and extraction *via* the bisulphite salt gave the title compound **5d** (116 mg, 55 %) as a clear oil. **5d**: [ $\alpha$ ]<sub>D</sub><sup>24</sup> = +109.6 (*c* 0.7, CH<sub>2</sub>Cl<sub>2</sub>);  $^1\text{H}$  NMR (300 MHz, CDCl<sub>3</sub>) :  $\delta\text{H}$  = 9.32 (1H, d,  $^3J$  (H,H) = 4.5 Hz, CHO), 7.90 (1H, dd,  $^3J$  (H,H) = 8.2 and 1.3 Hz, NO<sub>2</sub>CCH, Ar), 7.50 (1H, app. dt,  $^3J$  (H,H) = 1.5 and 7.5 Hz, *m*-CH, Ar), 7.36 (1H, app. dt,  $^3J$  (H,H) = 1.5 and 8.7 Hz, *p*-CH, Ar), 7.21 (1H, app. d,  $^3J$  (H,H) = 7.9 Hz, *o*-CH, Ar), 3.04 (1H, ddd,  $^3J$  (H,H) = 8.7, 7.4 and 4.5 Hz, *o*-NO<sub>2</sub>PhCH), 2.04 (1H, m, CHOCH) 1.71 (1H, app. dt,  $^3J$  (H,H) = 9.0 and 5.3 Hz, cyclopropyl-CH<sub>A</sub>CH<sub>B</sub>), 1.44 (1H, ddd,  $^3J$  (H,H) = 8.7, 7.2 and 5.3 Hz, cyclopropyl-CH<sub>A</sub>CH<sub>B</sub>);  $^{13}\text{C}$  NMR (75 MHz, CDCl<sub>3</sub>) :  $\delta\text{C}$  = 199.4 (CHO), 150.8 (NO<sub>2</sub>CH) 134.2 (Ar), 133.6 (Ar), 129.5 (Ar), 128.5 (Ar), 125.3 (Ar) 32.0 (CHOCH), 24.0 (*o*-NO<sub>2</sub>PhCH), 16.9 (cyclopropyl-CH<sub>2</sub>); IR (film / cm<sup>-1</sup>)  $\nu$  = 1708 (CHO), 1519 (NO<sub>2</sub>), 1344 (NO<sub>2</sub>); HRMS :  $m/z$  (EI) 191.0572, C<sub>10</sub>H<sub>9</sub>NO<sub>3</sub> requires 191.0577.
